# Supplementary figures and images for: Reactivating a positive feedback loop VTA-BLA-NAc circuit associated with positive experience ameliorates the attenuated reward sensitivity induced by chronic stress
Source: PubMed Central journal article supplement — Neurobiol Stress. 2021 Jul 24;15:100370. doi: 10.1016/j.ynstr.2021.100370 (PMC8334743; doi:10.1016/j.ynstr.2021.100370), 2021-07-24

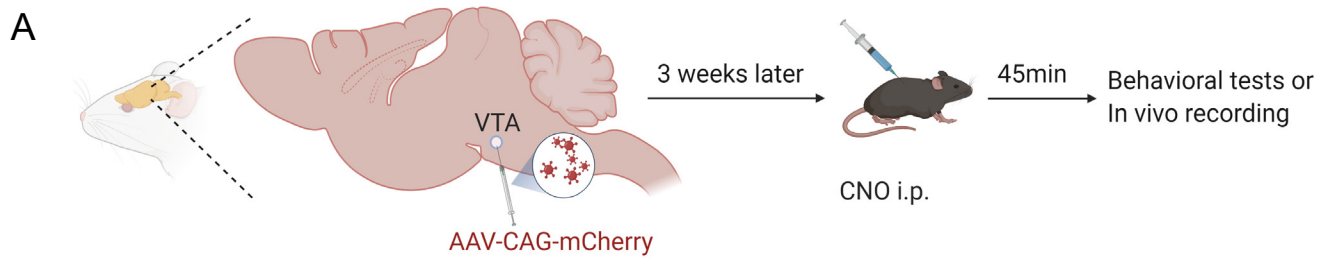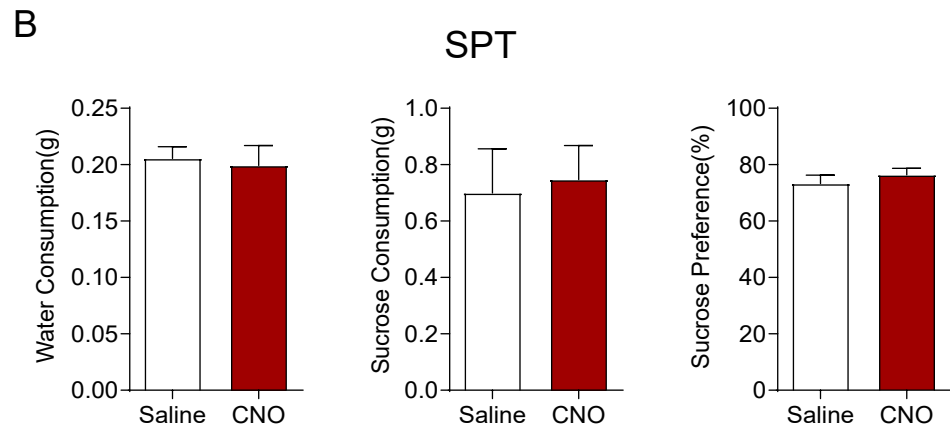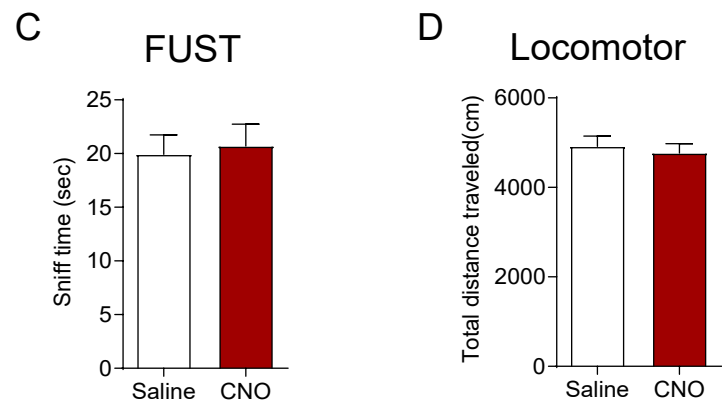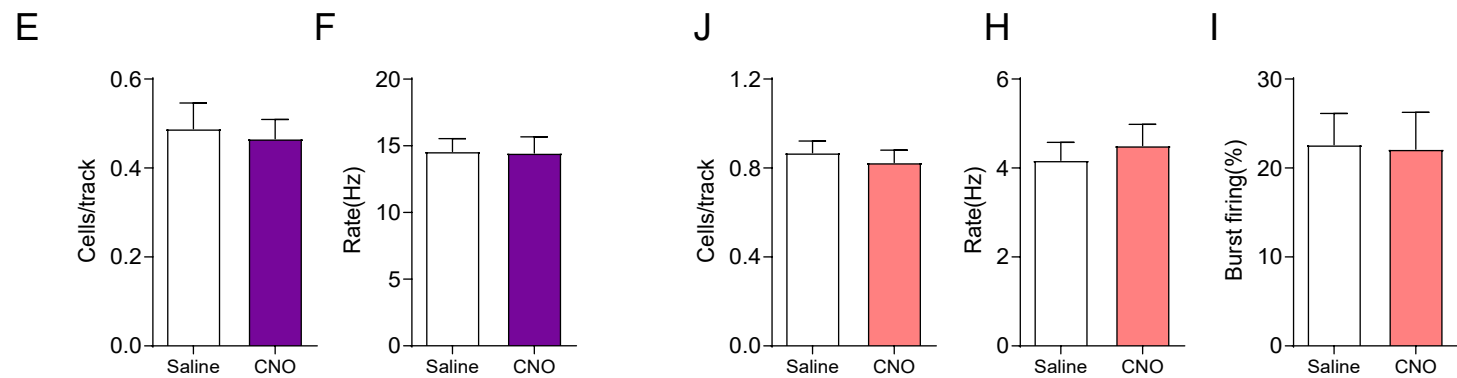

Supplement: mmc1.pdf [file mmc1.pdf]

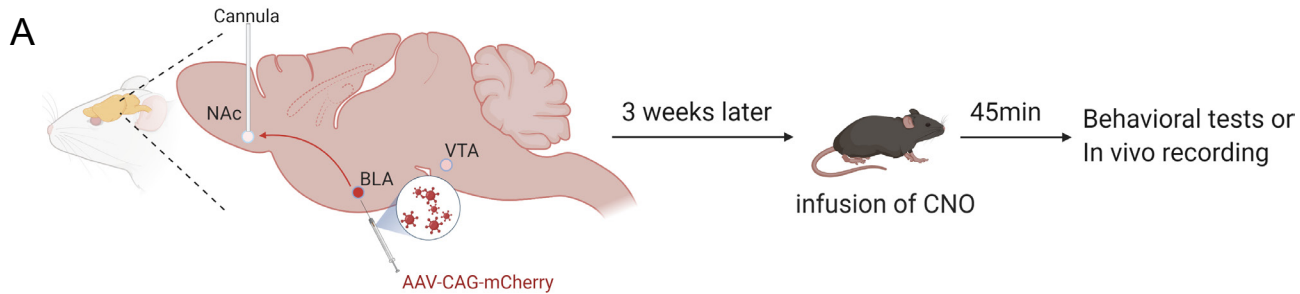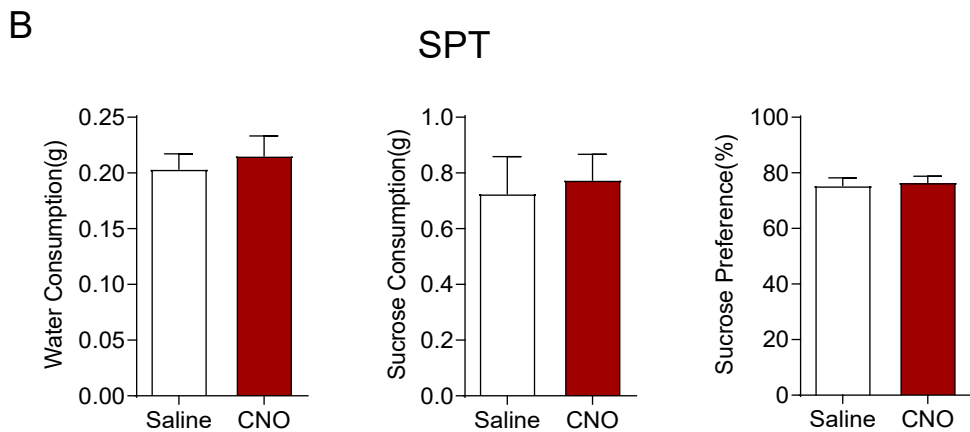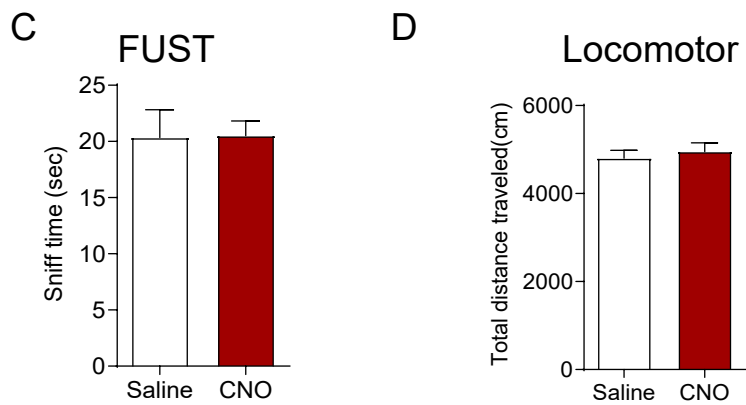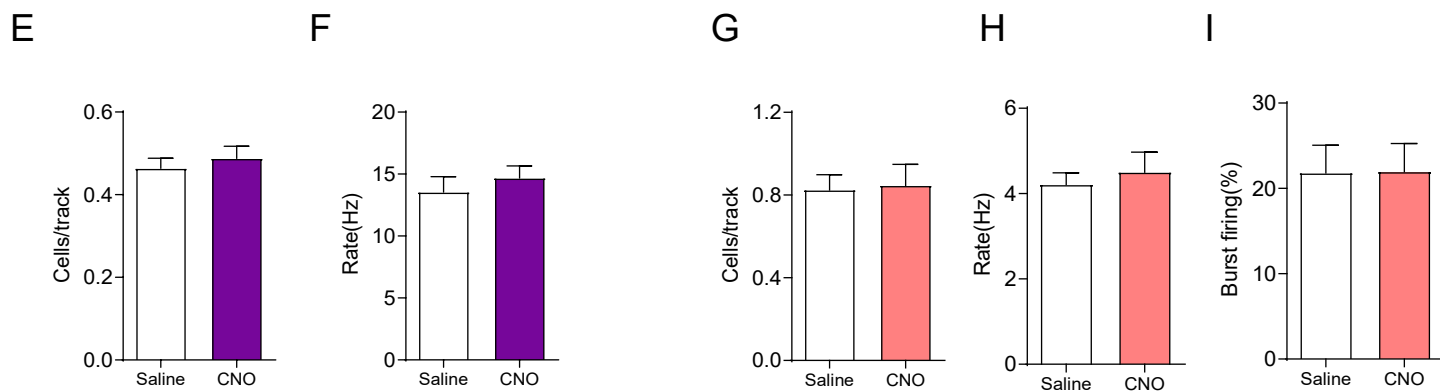

Supplement: mmc2.pdf [file mmc2.pdf]
